# Supplementary material
Source: PubMed Central journal article supplement (PMC2516215)
Supplement: 0707157105_0707157105SI.pdf [file 0707157105_0707157105SI.pdf]

# Supporting Information

Carwardine *et al.* 10.1073/pnas.0707157105

Table S1. Summary of spending, costs, and priority areas for mammals by country with and without socioeconomic objectives

| Continent and country    | Total spending (\$)* | Proportion of spending (%) | Average opportunity cost/ha of "potential conservation habitat" | Area selected for meeting targets (km <sup>2</sup> ) |                                  |                                                       | Irreplaceable area (km <sup>2</sup> ) |                                  |                                         |
|--------------------------|----------------------|----------------------------|-----------------------------------------------------------------|------------------------------------------------------|----------------------------------|-------------------------------------------------------|---------------------------------------|----------------------------------|-----------------------------------------|
|                          |                      |                            |                                                                 | Without socioeconomic objectives                     | When minimizing opportunity cost | Increase or decrease in area required to meet targets | Without socioeconomic objectives      | When minimizing opportunity cost | % of total increased irreplaceable area |
| <b>Africa</b>            | <b>\$167,290,474</b> | <b>11.42</b>               | <b>\$25,121</b>                                                 | <b>3,657,300</b>                                     | <b>3,650,800</b>                 | <b>-6,500</b>                                         | <b>167,400</b>                        | <b>186,400</b>                   | <b>4.20</b>                             |
| Cape Verde               | \$0                  | 0.00                       | \$40,000                                                        | 0                                                    | 0                                | 0                                                     | 0                                     | 0                                | 0.00                                    |
| Chad                     | \$0                  | 0.00                       | \$17,205                                                        | 119,800                                              | 147,400                          | 27,600                                                | 0                                     | 0                                | 0.00                                    |
| Glorioso Islands         | \$0                  | 0.00                       | \$23,451                                                        | 0                                                    | 0                                | 0                                                     | 0                                     | 0                                | 0.00                                    |
| Guinea                   | \$0                  | 0.00                       | \$39,843                                                        | 18,600                                               | 54,600                           | 36,000                                                | 0                                     | 0                                | 0.00                                    |
| Juan De Nova Island      | \$0                  | 0.00                       | \$60,000                                                        | 0                                                    | 0                                | 0                                                     | 0                                     | 0                                | 0.00                                    |
| Reunion                  | \$0                  | 0.00                       | \$40,000                                                        | 9,900                                                | 9,900                            | 0                                                     | 9,900                                 | 9,900                            | 0.00                                    |
| St. Helena               | \$0                  | 0.00                       | \$0                                                             | 0                                                    | 0                                | 0                                                     | 0                                     | 0                                | 0.00                                    |
| Togo                     | \$0                  | 0.00                       | \$87,099                                                        | 0                                                    | 9,400                            | 9,400                                                 | 0                                     | 0                                | 0.00                                    |
| Western Sahara           | \$0                  | 0.00                       | \$3                                                             | 10,000                                               | 10,000                           | 0                                                     | 0                                     | 0                                | 0.00                                    |
| Angola                   | \$90,080             | 0.01                       | \$34,512                                                        | 145,000                                              | 136,000                          | -9,000                                                | 0                                     | 0                                | 0.00                                    |
| Sierra Leone             | \$90,880             | 0.01                       | \$49,874                                                        | 8,400                                                | 8,600                            | 200                                                   | 0                                     | 0                                | 0.00                                    |
| Liberia                  | \$256,000            | 0.02                       | \$30,857                                                        | 17,400                                               | 33,000                           | 15,600                                                | 0                                     | 0                                | 0.00                                    |
| Swaziland                | \$297,080            | 0.02                       | \$20,000                                                        | 6,200                                                | 0                                | -6,200                                                | 0                                     | 0                                | 0.00                                    |
| Gambia, The              | \$328,333            | 0.02                       | \$30,000                                                        | 0                                                    | 0                                | 0                                                     | 0                                     | 0                                | 0.00                                    |
| Libya                    | \$339,980            | 0.02                       | \$442                                                           | 140,500                                              | 179,200                          | 38,700                                                | 0                                     | 0                                | 0.00                                    |
| Namibia                  | \$422,191            | 0.03                       | \$3,341                                                         | 116,100                                              | 108,600                          | -7,500                                                | 0                                     | 0                                | 0.00                                    |
| Equatorial Guinea        | \$459,350            | 0.03                       | \$20,135                                                        | 9,800                                                | 19,700                           | 9,900                                                 | 9,800                                 | 9,800                            | 0.00                                    |
| Burundi                  | \$502,250            | 0.03                       | \$30,000                                                        | 0                                                    | 6,400                            | 6,400                                                 | 0                                     | 0                                | 0.00                                    |
| Central African Republic | \$503,482            | 0.03                       | \$80,956                                                        | 50,000                                               | 69,900                           | 19,900                                                | 0                                     | 0                                | 0.00                                    |
| Rwanda                   | \$506,250            | 0.03                       | \$16,900                                                        | 12,700                                               | 6,500                            | -6,200                                                | 0                                     | 0                                | 0.00                                    |
| Sao Tome and Principe    | \$626,500            | 0.04                       | \$15,000                                                        | 9,800                                                | 9,800                            | 0                                                     | 9,800                                 | 9,800                            | 0.00                                    |
| Zambia                   | \$731,777            | 0.05                       | \$46,297                                                        | 71,400                                               | 78,300                           | 6,900                                                 | 0                                     | 0                                | 0.00                                    |
| Botswana                 | \$801,791            | 0.05                       | \$4,118                                                         | 51,800                                               | 54,800                           | 3,000                                                 | 0                                     | 0                                | 0.00                                    |
| Comoros                  | \$1,097,700          | 0.07                       | \$16,667                                                        | 9,300                                                | 9,300                            | 0                                                     | 9,300                                 | 9,300                            | 0.00                                    |
| Niger                    | \$1,231,211          | 0.08                       | \$2,408                                                         | 60,000                                               | 187,700                          | 127,700                                               | 0                                     | 0                                | 0.00                                    |
| Djibouti                 | \$1,244,865          | 0.08                       | \$0                                                             | 0                                                    | 0                                | 0                                                     | 0                                     | 0                                | 0.00                                    |
| Somalia                  | \$1,244,865          | 0.08                       | \$2,898                                                         | 89,500                                               | 78,800                           | -10,700                                               | 0                                     | 9,600                            | 2.12                                    |
| Sudan                    | \$1,244,865          | 0.08                       | \$26,392                                                        | 291,300                                              | 243,700                          | -47,600                                               | 10,000                                | 10,000                           | 0.00                                    |
| Algeria                  | \$1,260,372          | 0.09                       | \$722                                                           | 275,700                                              | 252,400                          | -23,300                                               | 0                                     | 0                                | 0.00                                    |
| Seychelles               | \$1,346,700          | 0.09                       | \$100,000                                                       | 9,800                                                | 9,800                            | 0                                                     | 0                                     | 0                                | 0.00                                    |
| Ivory Coast              | \$1,409,066          | 0.10                       | \$77,872                                                        | 45,000                                               | 36,800                           | -82,000                                               | 0                                     | 0                                | 0.00                                    |
| Guinea-Bissau            | \$1,472,700          | 0.10                       | \$28,321                                                        | 0                                                    | 0                                | 0                                                     | 0                                     | 0                                | 0.00                                    |
| Mauritania               | \$1,573,800          | 0.11                       | \$445                                                           | 89,400                                               | 70,000                           | -19,400                                               | 0                                     | 0                                | 0.00                                    |
| Nigeria                  | \$1,775,100          | 0.12                       | \$54,374                                                        | 84,000                                               | 66,000                           | -18,000                                               | 0                                     | 0                                | 0.00                                    |
| Mauritius                | \$2,062,093          | 0.14                       | \$20,000                                                        | 10,000                                               | 10,000                           | 0                                                     | 0                                     | 0                                | 0.00                                    |
| Tunisia                  | \$2,159,960          | 0.15                       | \$5,530                                                         | 18,200                                               | 17,600                           | -600                                                  | 0                                     | 0                                | 0.00                                    |
| Cameroon                 | \$2,260,098          | 0.15                       | \$68,928                                                        | 88,400                                               | 78,700                           | -9,700                                                | 0                                     | 0                                | 0.00                                    |
| Egypt                    | \$2,292,093          | 0.16                       | \$4,353                                                         | 148,300                                              | 129,100                          | -19,200                                               | 10000                                 | 10,000                           | 0.00                                    |
| Benin                    | \$2,371,515          | 0.16                       | \$70,044                                                        | 47,100                                               | 9,200                            | -37,900                                               | 0                                     | 0                                | 0.00                                    |
| Eritrea                  | \$2,382,300          | 0.16                       | \$3,218                                                         | 20,000                                               | 20,000                           | 0                                                     | 10000                                 | 10,000                           | 0.00                                    |
| Mali                     | \$2,400,994          | 0.16                       | \$11,144                                                        | 107,300                                              | 106,800                          | -500                                                  | 8200                                  | 8,200                            | 0.00                                    |
| Ethiopia                 | \$2,804,790          | 0.19                       | \$16,891                                                        | 165,300                                              | 138,400                          | -26,900                                               | 0                                     | 9,400                            | 2.08                                    |
| Lesotho                  | \$3,307,932          | 0.23                       | \$13,692                                                        | 0                                                    | 7,600                            | 7,600                                                 | 0                                     | 0                                | 0.00                                    |
| Gabon                    | \$3,369,525          | 0.23                       | \$54,034                                                        | 39,700                                               | 30,000                           | -9,700                                                | 0                                     | 0                                | 0.00                                    |

Table S1. Continued.

| Continent and country      | Total spending (\$)* | Proportion of spending (%) | Average opportunity cost/ha of "potential conservation habitat" | Area selected for meeting targets (km <sup>2</sup> ) |                                  |                                                       | Irreplaceable area (km <sup>2</sup> ) |                                  |                                         |
|----------------------------|----------------------|----------------------------|-----------------------------------------------------------------|------------------------------------------------------|----------------------------------|-------------------------------------------------------|---------------------------------------|----------------------------------|-----------------------------------------|
|                            |                      |                            |                                                                 | Without socioeconomic objectives                     | When minimizing opportunity cost | Increase or decrease in area required to meet targets | Without socioeconomic objectives      | When minimizing opportunity cost | % of total increased irreplaceable area |
| Senegal                    | \$3,863,425          | 0.26                       | \$25,964                                                        | 53,300                                               | 40,400                           | -12,900                                               | 0                                     | 0                                | 0.00                                    |
| Malawi                     | \$4,046,659          | 0.28                       | \$44,444                                                        | 35,300                                               | 26,500                           | -8,800                                                | 0                                     | 0                                | 0.00                                    |
| Congo                      | \$4,268,672          | 0.29                       | \$52,811                                                        | 321,600                                              | 291,500                          | -30,100                                               | 0                                     | 0                                | 0.00                                    |
| Mozambique                 | \$5,262,271          | 0.36                       | \$63,613                                                        | 88,300                                               | 63,000                           | -25,300                                               | 0                                     | 0                                | 0.00                                    |
| Morocco                    | \$5,464,403          | 0.37                       | \$7,769                                                         | 91,800                                               | 47,100                           | -44,700                                               | 10700                                 | 10,700                           | 0.00                                    |
| Ghana                      | \$6,148,323          | 0.42                       | \$79,641                                                        | 37,400                                               | 45,700                           | 8,300                                                 | 0                                     | 0                                | 0.00                                    |
| Burkina Faso               | \$6,767,007          | 0.46                       | \$43,359                                                        | 17,500                                               | 38,600                           | 21,100                                                | 0                                     | 0                                | 0.00                                    |
| Mayotte                    | \$7,880,988          | 0.54                       | \$20,000                                                        | 0                                                    | 0                                | 0                                                     | 0                                     | 0                                | 0.00                                    |
| Kenya                      | \$8,530,426          | 0.58                       | \$13,090                                                        | 97,300                                               | 127,600                          | 30,300                                                | 9500                                  | 9,500                            | 0.00                                    |
| South Africa               | \$10,540,895         | 0.72                       | \$6,815                                                         | 181,000                                              | 204,800                          | 23,800                                                | 10000                                 | 10,000                           | 0.00                                    |
| Madagascar                 | \$10,809,702         | 0.74                       | \$30,574                                                        | 132,200                                              | 122,200                          | -10,000                                               | 56300                                 | 56,300                           | 0.00                                    |
| Uganda                     | \$15,372,240         | 1.05                       | \$68,952                                                        | 37,200                                               | 38,500                           | 1,300                                                 | 0                                     | 0                                | 0.00                                    |
| Tanzania                   | \$15,378,754         | 1.05                       | \$54,121                                                        | 126,400                                              | 97,700                           | -28,700                                               | 3900                                  | 3,900                            | 0.00                                    |
| Zimbabwe                   | \$16,688,221         | 1.14                       | \$20,598                                                        | 42,300                                               | 63,200                           | 20,900                                                | 0                                     | 0                                | 0.00                                    |
| <b>Asia</b>                | <b>\$254,632,379</b> | <b>17.38</b>               | <b>\$17,887</b>                                                 | <b>4,418,300</b>                                     | <b>4,621,200</b>                 | <b>202,900</b>                                        | <b>348500</b>                         | <b>573,200</b>                   | <b>49.65</b>                            |
| Afghanistan                | \$0                  | 0.00                       | \$1,439                                                         | 44,500                                               | 64,600                           | 20,100                                                | 0                                     | 0                                | 0.00                                    |
| Azerbaijan                 | \$0                  | 0.00                       | \$15,023                                                        | 18,400                                               | 11,200                           | -7,200                                                | 0                                     | 0                                | 0.00                                    |
| Brunei                     | \$0                  | 0.00                       | \$10,000                                                        | 7,300                                                | 0                                | -7,300                                                | 0                                     | 0                                | 0.00                                    |
| Christmas Island           | \$0                  | 0.00                       | \$10,000                                                        | 0                                                    | 0                                | 0                                                     | 0                                     | 0                                | 0.00                                    |
| East Timor                 | \$0                  | 0.00                       | \$44,805                                                        | 6,300                                                | 7,000                            | 700                                                   | 0                                     | 0                                | 0.00                                    |
| Iraq                       | \$0                  | 0.00                       | \$2,276                                                         | 63,200                                               | 45,600                           | -17,600                                               | 0                                     | 0                                | 0.00                                    |
| Israel                     | \$0                  | 0.00                       | \$11,749                                                        | 13,400                                               | 9,500                            | -3,900                                                | 9500                                  | 9,500                            | 0.00                                    |
| Kuwait                     | \$0                  | 0.00                       | \$0                                                             | 0                                                    | 0                                | 0                                                     | 0                                     | 0                                | 0.00                                    |
| Maldives                   | \$0                  | 0.00                       | \$51,610                                                        | 0                                                    | 0                                | 0                                                     | 0                                     | 0                                | 0.00                                    |
| Paracel Islands            | \$0                  | 0.00                       | \$43,333                                                        | 0                                                    | 0                                | 0                                                     | 0                                     | 0                                | 0.00                                    |
| Qatar                      | \$0                  | 0.00                       | \$0                                                             | 0                                                    | 0                                | 0                                                     | 0                                     | 0                                | 0.00                                    |
| Saudi Arabia               | \$0                  | 0.00                       | \$142                                                           | 199,600                                              | 199,400                          | -200                                                  | 0                                     | 0                                | 0.00                                    |
| Spratly Islands            | \$0                  | 0.00                       | \$75,000                                                        | 0                                                    | 0                                | 0                                                     | 0                                     | 0                                | 0.00                                    |
| Taiwan                     | \$0                  | 0.00                       | \$18,568                                                        | 25,400                                               | 18,200                           | -7,200                                                | 12600                                 | 12,600                           | 0.00                                    |
| Tajikistan                 | \$0                  | 0.00                       | \$3,617                                                         | 25,600                                               | 24,500                           | -1,100                                                | 0                                     | 0                                | 0.00                                    |
| Turkmenistan               | \$0                  | 0.00                       | \$349                                                           | 67,300                                               | 104,900                          | 37,600                                                | 0                                     | 0                                | 0.00                                    |
| United Arab Emirates       | \$0                  | 0.00                       | \$0                                                             | 0                                                    | 9,900                            | 9,900                                                 | 0                                     | 0                                | 0.00                                    |
| Oman                       | \$150,000            | 0.01                       | \$427                                                           | 59,800                                               | 40,000                           | -19,800                                               | 0                                     | 0                                | 0.00                                    |
| Myanmar (Burma)            | \$195,080            | 0.01                       | \$31,473                                                        | 100,500                                              | 128,400                          | 27,900                                                | 8500                                  | 18,100                           | 2.12                                    |
| Japan                      | \$285,181            | 0.02                       | \$27,985                                                        | 136,600                                              | 124,800                          | -11,800                                               | 6900                                  | 33,300                           | 5.83                                    |
| South Korea                | \$285,181            | 0.02                       | \$26,827                                                        | 28,900                                               | 13,700                           | -15,200                                               | 0                                     | 0                                | 0.00                                    |
| Iran                       | \$350,000            | 0.02                       | \$1,507                                                         | 183,800                                              | 219,700                          | 35,900                                                | 0                                     | 0                                | 0.00                                    |
| Bhutan                     | \$488,000            | 0.03                       | \$0                                                             | 9,300                                                | 19,000                           | 9,700                                                 | 0                                     | 0                                | 0.00                                    |
| Jordan                     | \$646,765            | 0.04                       | \$449                                                           | 3,600                                                | 11,100                           | 7,500                                                 | 0                                     | 0                                | 0.00                                    |
| Syria                      | \$668,642            | 0.05                       | \$4,686                                                         | 43,100                                               | 36,500                           | -6,600                                                | 0                                     | 9,500                            | 2.10                                    |
| Thailand                   | \$750,545            | 0.05                       | \$46,530                                                        | 83,900                                               | 46,900                           | -37,000                                               | 7200                                  | 7,200                            | 0.00                                    |
| Lebanon                    | \$859,433            | 0.06                       | \$8,442                                                         | 5,500                                                | 5,500                            | 0                                                     | 0                                     | 0                                | 0.00                                    |
| Mongolia                   | \$999,295            | 0.07                       | \$133                                                           | 212,300                                              | 175,500                          | -36,800                                               | 0                                     | 0                                | 0.00                                    |
| Yemen                      | \$1,327,784          | 0.09                       | \$0                                                             | 39,900                                               | 69,200                           | 29,300                                                | 10000                                 | 10,000                           | 0.00                                    |
| Kyrgyzstan                 | \$1,372,646          | 0.09                       | \$1,462                                                         | 16,800                                               | 22,400                           | 5,600                                                 | 0                                     | 0                                | 0.00                                    |
| Cyprus                     | \$1,708,467          | 0.12                       | \$5,973                                                         | 5,700                                                | 11,800                           | 6,100                                                 | 0                                     | 0                                | 0.00                                    |
| Malaysia                   | \$1,949,986          | 0.13                       | \$8,583                                                         | 70,900                                               | 97,200                           | 26,300                                                | 15400                                 | 15,400                           | 0.00                                    |
| Laos                       | \$2,044,017          | 0.14                       | \$15,920                                                        | 44,700                                               | 27,800                           | -16,900                                               | 8600                                  | 8,600                            | 0.00                                    |
| Armenia                    | \$2,215,376          | 0.15                       | \$10,000                                                        | 0                                                    | 7,000                            | 7,000                                                 | 0                                     | 0                                | 0.00                                    |
| Uzbekistan                 | \$2,829,421          | 0.19                       | \$4,403                                                         | 35,800                                               | 0                                | -35,800                                               | 0                                     | 0                                | 0.00                                    |
| Cambodia                   | \$3,311,379          | 0.23                       | \$74,841                                                        | 18,600                                               | 28,000                           | 9,400                                                 | 0                                     | 0                                | 0.00                                    |
| Nepal                      | \$3,647,781          | 0.25                       | \$13,923                                                        | 29,600                                               | 16,800                           | -12,800                                               | 0                                     | 0                                | 0.00                                    |
| Georgia                    | \$4,606,525          | 0.31                       | \$14,519                                                        | 26,700                                               | 17,900                           | -8,800                                                | 8900                                  | 8,900                            | 0.00                                    |
| Philippines                | \$4,792,050          | 0.33                       | \$29,794                                                        | 113,100                                              | 112,700                          | -400                                                  | 37900                                 | 53,500                           | 3.45                                    |
| Bangladesh                 | \$5,686,438          | 0.39                       | \$90,721                                                        | 13,000                                               | 13,100                           | 100                                                   | 0                                     | 0                                | 0.00                                    |
| Sri Lanka                  | \$6,055,281          | 0.41                       | \$61,644                                                        | 17,900                                               | 15,900                           | -2,000                                                | 7300                                  | 7,300                            | 0.00                                    |
| Pakistan                   | \$9,227,548          | 0.63                       | \$5,810                                                         | 111,500                                              | 113,900                          | 2,400                                                 | 0                                     | 0                                | 0.00                                    |
| Brit. Indian Ocean Territ. | \$9,835,214          | 0.67                       | \$0                                                             | 0                                                    | 0                                | 0                                                     | 0                                     | 0                                | 0.00                                    |
| North Korea                | \$11,696,007         | 0.80                       | \$15,366                                                        | 22,600                                               | 57,800                           | 35,200                                                | 0                                     | 15,900                           | 3.51                                    |
| Turkey                     | \$11,968,328         | 0.82                       | \$13,552                                                        | 94,900                                               | 82,100                           | -12,800                                               | 7700                                  | 22,200                           | 3.20                                    |

Table S1. Continued.

| Continent and country   | Total spending (\$)* | Proportion of spending (%) | Average opportunity cost/ha of "potential conservation habitat" | Area selected for meeting targets (km <sup>2</sup> ) |                                  |                                                       | Irreplaceable area (km <sup>2</sup> ) |                                  |                                         |
|-------------------------|----------------------|----------------------------|-----------------------------------------------------------------|------------------------------------------------------|----------------------------------|-------------------------------------------------------|---------------------------------------|----------------------------------|-----------------------------------------|
|                         |                      |                            |                                                                 | Without socioeconomic objectives                     | When minimizing opportunity cost | Increase or decrease in area required to meet targets | Without socioeconomic objectives      | When minimizing opportunity cost | % of total increased irreplaceable area |
| Vietnam                 | \$12,232,359         | 0.83                       | \$30,242                                                        | 66,300                                               | 65,200                           | -1,100                                                | 11600                                 | 19,000                           | 1.63                                    |
| Kazakhstan              | \$15,272,115         | 1.04                       | \$1,045                                                         | 338,000                                              | 362,200                          | 24,200                                                | 0                                     | 0                                | 0.00                                    |
| Indonesia               | \$21,878,240         | 1.49                       | \$18,908                                                        | 542,300                                              | 598,300                          | 56,000                                                | 137700                                | 205,200                          | 14.91                                   |
| India                   | \$50,146,569         | 3.42                       | \$34,676                                                        | 410,600                                              | 430,900                          | 20,300                                                | 54100                                 | 74,700                           | 4.55                                    |
| China                   | \$65,150,726         | 4.45                       | \$6,720                                                         | 1,061,100                                            | 1,155,100                        | 94,000                                                | 4600                                  | 42,300                           | 8.33                                    |
| <b>Australasia</b>      | <b>\$16,910,740</b>  | <b>1.15</b>                | <b>\$20,271</b>                                                 | <b>1,419,800</b>                                     | <b>1,473,200</b>                 | <b>53,400</b>                                         | <b>139100</b>                         | <b>168,600</b>                   | <b>6.52</b>                             |
| American Samoa          | \$0                  | 0.00                       | \$0                                                             | 10,000                                               | 0                                | -10,000                                               | 0                                     | 0                                | 0.00                                    |
| Australia               | \$0                  | 0.00                       | \$9,914                                                         | 1,015,800                                            | 1,057,900                        | 42,100                                                | 10000                                 | 10,000                           | 0.00                                    |
| Baker Island            | \$0                  | 0.00                       | \$0                                                             | 0                                                    | 0                                | 0                                                     | 0                                     | 0                                | 0.00                                    |
| Cocos (Keeling) Islands | \$0                  | 0.00                       | \$20,000                                                        | 4,000                                                | 4,000                            | 0                                                     | 4000                                  | 4,000                            | 0.00                                    |
| French Polynesia        | \$0                  | 0.00                       | \$0                                                             | 0                                                    | 0                                | 0                                                     | 0                                     | 0                                | 0.00                                    |
| Guam                    | \$0                  | 0.00                       | \$10,000                                                        | 0                                                    | 0                                | 0                                                     | 0                                     | 0                                | 0.00                                    |
| Howland Island          | \$0                  | 0.00                       | \$0                                                             | 0                                                    | 0                                | 0                                                     | 0                                     | 0                                | 0.00                                    |
| Jarvis Island           | \$0                  | 0.00                       | \$0                                                             | 0                                                    | 0                                | 0                                                     | 0                                     | 0                                | 0.00                                    |
| Johnston Atoll          | \$0                  | 0.00                       | \$0                                                             | 0                                                    | 0                                | 0                                                     | 0                                     | 0                                | 0.00                                    |
| Kiribati                | \$0                  | 0.00                       | \$0                                                             | 0                                                    | 0                                | 0                                                     | 0                                     | 0                                | 0.00                                    |
| Marshall Islands        | \$0                  | 0.00                       | \$0                                                             | 0                                                    | 0                                | 0                                                     | 0                                     | 0                                | 0.00                                    |
| Midway Islands          | \$0                  | 0.00                       | \$0                                                             | 0                                                    | 0                                | 0                                                     | 0                                     | 0                                | 0.00                                    |
| Nauru                   | \$0                  | 0.00                       | \$0                                                             | 0                                                    | 0                                | 0                                                     | 0                                     | 0                                | 0.00                                    |
| New Caledonia           | \$0                  | 0.00                       | \$14,615                                                        | 20,000                                               | 20,000                           | 0                                                     | 0                                     | 0                                | 0.00                                    |
| New Zealand             | \$0                  | 0.00                       | \$12,487                                                        | 58,300                                               | 59,100                           | 800                                                   | 0                                     | 0                                | 0.00                                    |
| Norfolk Island          | \$0                  | 0.00                       | \$60,000                                                        | 0                                                    | 0                                | 0                                                     | 0                                     | 0                                | 0.00                                    |
| Northern Mariana Is.    | \$0                  | 0.00                       | \$20,000                                                        | 0                                                    | 0                                | 0                                                     | 0                                     | 0                                | 0.00                                    |
| Pitcairn Islands        | \$0                  | 0.00                       | \$15,038                                                        | 0                                                    | 0                                | 0                                                     | 0                                     | 0                                | 0.00                                    |
| Tokelau                 | \$0                  | 0.00                       | \$0                                                             | 0                                                    | 0                                | 0                                                     | 0                                     | 0                                | 0.00                                    |
| Tuvalu                  | \$0                  | 0.00                       | \$20,000                                                        | 0                                                    | 0                                | 0                                                     | 0                                     | 0                                | 0.00                                    |
| Vanuatu                 | \$0                  | 0.00                       | \$1,429                                                         | 20,000                                               | 40,000                           | 20,000                                                | 10,000                                | 10,000                           | 0.00                                    |
| Wake Island             | \$0                  | 0.00                       | \$29,071                                                        | 0                                                    | 0                                | 0                                                     | 0                                     | 0                                | 0.00                                    |
| Wallis and Futuna       | \$0                  | 0.00                       | \$28,389                                                        | 0                                                    | 0                                | 0                                                     | 0                                     | 0                                | 0.00                                    |
| Cook Islands            | \$146,100            | 0.01                       | \$0                                                             | 10,000                                               | 0                                | -10,000                                               | 0                                     | 0                                | 0.00                                    |
| Fiji                    | \$189,048            | 0.01                       | \$8,571                                                         | 20,000                                               | 20,000                           | 0                                                     | 0                                     | 0                                | 0.00                                    |
| Niue                    | \$280,000            | 0.02                       | \$0                                                             | 0                                                    | 0                                | 0                                                     | 0                                     | 0                                | 0.00                                    |
| Tonga                   | \$318,000            | 0.02                       | \$0                                                             | 0                                                    | 10,000                           | 10,000                                                | 0                                     | 0                                | 0.00                                    |
| Solomon Islands         | \$615,223            | 0.04                       | \$5,385                                                         | 60,000                                               | 60,000                           | 0                                                     | 20000                                 | 20,000                           | 0.00                                    |
| Samoa                   | \$625,000            | 0.04                       | \$0                                                             | 0                                                    | 10,000                           | 10,000                                                | 0                                     | 0                                | 0.00                                    |
| Micronesia              | \$988,469            | 0.07                       | \$13,333                                                        | 0                                                    | 0                                | 0                                                     | 0                                     | 0                                | 0.00                                    |
| Pacific Islands (Palau) | \$1,118,008          | 0.08                       | \$0                                                             | 5,400                                                | 5,400                            | 0                                                     | 5400                                  | 5,400                            | 0.00                                    |
| Papua New Guinea        | \$12,630,892         | 0.86                       | \$13,360                                                        | 196,300                                              | 186,800                          | -9,500                                                | 89700                                 | 119,200                          | 6.52                                    |
| <b>Europe</b>           | <b>\$30,170,635</b>  | <b>2.06</b>                | <b>\$21,341</b>                                                 | <b>2,852,000</b>                                     | <b>2,903,300</b>                 | <b>51,300</b>                                         | <b>46500</b>                          | <b>146,000</b>                   | <b>21.98</b>                            |
| Andorra                 | \$0                  | 0.00                       | \$10,000                                                        | 8,500                                                | 0                                | -8,500                                                | 0                                     | 0                                | 0.00                                    |
| Austria                 | \$0                  | 0.00                       | \$28,313                                                        | 15,300                                               | 16,000                           | 700                                                   | 0                                     | 8,400                            | 1.86                                    |
| Belarus                 | \$0                  | 0.00                       | \$56,633                                                        | 12,500                                               | 13,200                           | 700                                                   | 7000                                  | 0                                | -1.55                                   |
| Belgium                 | \$0                  | 0.00                       | \$88,678                                                        | 0                                                    | 0                                | 0                                                     | 0                                     | 0                                | 0.00                                    |
| Bosnia and Herzegovina  | \$0                  | 0.00                       | \$28,902                                                        | 0                                                    | 20,400                           | 20,400                                                | 0                                     | 0                                | 0.00                                    |
| Czech Republic          | \$0                  | 0.00                       | \$42,195                                                        | 15,100                                               | 13,800                           | -1,300                                                | 0                                     | 0                                | 0.00                                    |
| Denmark                 | \$0                  | 0.00                       | \$47,500                                                        | 0                                                    | 0                                | 0                                                     | 0                                     | 0                                | 0.00                                    |
| Estonia                 | \$0                  | 0.00                       | \$36,103                                                        | 15,900                                               | 15,900                           | 0                                                     | 0                                     | 0                                | 0.00                                    |
| Faroe Islands           | \$0                  | 0.00                       | \$10,000                                                        | 0                                                    | 0                                | 0                                                     | 0                                     | 0                                | 0.00                                    |
| Finland                 | \$0                  | 0.00                       | \$7,164                                                         | 46,500                                               | 47,300                           | 800                                                   | 0                                     | 0                                | 0.00                                    |
| France                  | \$0                  | 0.00                       | \$41,373                                                        | 61,300                                               | 91,800                           | 30,500                                                | 6400                                  | 22,000                           | 3.45                                    |
| Germany                 | \$0                  | 0.00                       | \$49,989                                                        | 50,700                                               | 31,200                           | -19,500                                               | 0                                     | 0                                | 0.00                                    |
| Greece                  | \$0                  | 0.00                       | \$13,217                                                        | 42,400                                               | 41,500                           | -900                                                  | 8600                                  | 8,600                            | 0.00                                    |
| Guernsey                | \$0                  | 0.00                       | \$90,000                                                        | 0                                                    | 0                                | 0                                                     | 0                                     | 0                                | 0.00                                    |
| Hungary                 | \$0                  | 0.00                       | \$41,140                                                        | 7,200                                                | 9,900                            | 2,700                                                 | 0                                     | 0                                | 0.00                                    |
| Iceland                 | \$0                  | 0.00                       | \$11                                                            | 0                                                    | 0                                | 0                                                     | 0                                     | 0                                | 0.00                                    |
| Ireland                 | \$0                  | 0.00                       | \$63,612                                                        | 0                                                    | 0                                | 0                                                     | 0                                     | 0                                | 0.00                                    |
| Italy                   | \$0                  | 0.00                       | \$22,917                                                        | 69,300                                               | 81,100                           | 11,800                                                | 0                                     | 8,400                            | 1.86                                    |
| Jan Mayen               | \$0                  | 0.00                       | \$5,000                                                         | 0                                                    | 0                                | 0                                                     | 0                                     | 0                                | 0.00                                    |
| Latvia                  | \$0                  | 0.00                       | \$59,788                                                        | 0                                                    | 15,500                           | 15,500                                                | 0                                     | 0                                | 0.00                                    |

Table S1. Continued.

| Continent and country    | Total spending (\$)* | Proportion of spending (%) | Average opportunity cost/ha of "potential conservation habitat" | Area selected for meeting targets (km <sup>2</sup> ) |                                  |                                                       | Irreplaceable area (km <sup>2</sup> ) |                                  |                                         |
|--------------------------|----------------------|----------------------------|-----------------------------------------------------------------|------------------------------------------------------|----------------------------------|-------------------------------------------------------|---------------------------------------|----------------------------------|-----------------------------------------|
|                          |                      |                            |                                                                 | Without socioeconomic objectives                     | When minimizing opportunity cost | Increase or decrease in area required to meet targets | Without socioeconomic objectives      | When minimizing opportunity cost | % of total increased irreplaceable area |
| Lithuania                | \$0                  | 0.00                       | \$56,448                                                        | 12,000                                               | 0                                | -12,000                                               | 0                                     | 0                                | 0.00                                    |
| Malta                    | \$0                  | 0.00                       | \$53,333                                                        | 0                                                    | 0                                | 0                                                     | 0                                     | 0                                | 0.00                                    |
| Netherlands              | \$0                  | 0.00                       | \$81,612                                                        | 0                                                    | 3,000                            | 3,000                                                 | 0                                     | 0                                | 0.00                                    |
| Norway                   | \$0                  | 0.00                       | \$2,396                                                         | 65,400                                               | 57,700                           | -7,700                                                | 0                                     | 0                                | 0.00                                    |
| Portugal                 | \$0                  | 0.00                       | \$13,886                                                        | 26,000                                               | 25,000                           | -1,000                                                | 0                                     | 0                                | 0.00                                    |
| Slovenia                 | \$0                  | 0.00                       | \$24,895                                                        | 7,300                                                | 14,300                           | 7,000                                                 | 0                                     | 0                                | 0.00                                    |
| Spain                    | \$0                  | 0.00                       | \$15,319                                                        | 92,900                                               | 119,700                          | 26,800                                                | 5900                                  | 15,800                           | 2.19                                    |
| Svalbard                 | \$0                  | 0.00                       | \$0                                                             | 0                                                    | 0                                | 0                                                     | 0                                     | 0                                | 0.00                                    |
| Sweden                   | \$0                  | 0.00                       | \$10,118                                                        | 93,100                                               | 106,200                          | 13,100                                                | 0                                     | 48,900                           | 10.80                                   |
| Switzerland              | \$0                  | 0.00                       | \$24,640                                                        | 0                                                    | 9,100                            | 9,100                                                 | 0                                     | 0                                | 0.00                                    |
| Yugoslavia               | \$0                  | 0.00                       | \$23,922                                                        | 22,400                                               | 18,600                           | -3,800                                                | 0                                     | 0                                | 0.00                                    |
| United Kingdom           | \$173,200            | 0.01                       | \$45,827                                                        | 43,600                                               | 24,700                           | -18,900                                               | 0                                     | 0                                | 0.00                                    |
| Man, Isle of             | \$220,000            | 0.02                       | \$60,000                                                        | 0                                                    | 0                                | 0                                                     | 0                                     | 0                                | 0.00                                    |
| Slovakia                 | \$337,500            | 0.02                       | \$18,824                                                        | 7,100                                                | 0                                | -7,100                                                | 0                                     | 0                                | 0.00                                    |
| Macedonia                | \$338,422            | 0.02                       | \$14,554                                                        | 10,100                                               | 4,600                            | -5,500                                                | 0                                     | 0                                | 0.00                                    |
| Poland                   | \$387,333            | 0.03                       | \$42,766                                                        | 27,400                                               | 18,600                           | -8,800                                                | 0                                     | 0                                | 0.00                                    |
| Moldova                  | \$495,000            | 0.03                       | \$32,983                                                        | 11,800                                               | 3,800                            | -8,000                                                | 0                                     | 0                                | 0.00                                    |
| Albania                  | \$786,255            | 0.05                       | \$17,440                                                        | 0                                                    | 9,800                            | 9,800                                                 | 0                                     | 0                                | 0.00                                    |
| Bulgaria                 | \$1,710,331          | 0.12                       | \$29,917                                                        | 15,200                                               | 9,700                            | -5,500                                                | 0                                     | 0                                | 0.00                                    |
| Romania                  | \$1,897,988          | 0.13                       | \$30,492                                                        | 23,300                                               | 34,300                           | 11,000                                                | 0                                     | 0                                | 0.00                                    |
| Ukraine                  | \$2,828,864          | 0.19                       | \$36,577                                                        | 51,600                                               | 59,300                           | 7,700                                                 | 0                                     | 4,100                            | 0.91                                    |
| Russia                   | \$4,547,330          | 0.31                       | \$3,545                                                         | 198,500                                              | 1,980,900                        | -4,100                                                | 18600                                 | 29,800                           | 2.47                                    |
| Croatia                  | \$16,448,412         | 1.12                       | \$36,328                                                        | 13,100                                               | 6,400                            | -6,700                                                | 0                                     | 0                                | 0.00                                    |
| North/Central America    | <b>\$880,555,889</b> | <b>60.09</b>               | <b>\$26,557</b>                                                 | <b>4,363,300</b>                                     | <b>4,430,900</b>                 | <b>67,600</b>                                         | <b>297100</b>                         | <b>367,000</b>                   | <b>15.44</b>                            |
| Anguilla                 | \$0                  | 0.00                       | \$20,000                                                        | 0                                                    | 0                                | 0                                                     | 0                                     | 0                                | 0.00                                    |
| Antigua and Barbuda      | \$0                  | 0.00                       | \$20,000                                                        | 0                                                    | 0                                | 0                                                     | 0                                     | 0                                | 0.00                                    |
| Barbados                 | \$0                  | 0.00                       | \$20,000                                                        | 0                                                    | 0                                | 0                                                     | 0                                     | 0                                | 0.00                                    |
| Bermuda                  | \$0                  | 0.00                       | \$10,000                                                        | 0                                                    | 0                                | 0                                                     | 0                                     | 0                                | 0.00                                    |
| British Virgin Islands   | \$0                  | 0.00                       | \$20,000                                                        | 0                                                    | 0                                | 0                                                     | 0                                     | 0                                | 0.00                                    |
| Cayman Islands           | \$0                  | 0.00                       | \$90,000                                                        | 0                                                    | 0                                | 0                                                     | 0                                     | 0                                | 0.00                                    |
| Dominica                 | \$0                  | 0.00                       | \$110,000                                                       | 10,000                                               | 10,000                           | 0                                                     | 10000                                 | 10,000                           | 0.00                                    |
| Greenland                | \$0                  | 0.00                       | \$0                                                             | 0                                                    | 0                                | 0                                                     | 0                                     | 0                                | 0.00                                    |
| Guadeloupe               | \$0                  | 0.00                       | \$20,000                                                        | 10,000                                               | 0                                | -10,000                                               | 0                                     | 0                                | 0.00                                    |
| Montserrat               | \$0                  | 0.00                       | \$20,000                                                        | 0                                                    | 0                                | 0                                                     | 0                                     | 0                                | 0.00                                    |
| Netherlands Antilles     | \$0                  | 0.00                       | \$15,077                                                        | 9,600                                                | 9,600                            | 0                                                     | 9600                                  | 9,600                            | 0.00                                    |
| Puerto Rico              | \$0                  | 0.00                       | \$39,897                                                        | 9,800                                                | 9,700                            | -100                                                  | 0                                     | 0                                | 0.00                                    |
| St. Kitts and Nevis      | \$0                  | 0.00                       | \$20,000                                                        | 0                                                    | 10,000                           | 10,000                                                | 0                                     | 0                                | 0.00                                    |
| St. Lucia                | \$0                  | 0.00                       | \$20,000                                                        | 0                                                    | 0                                | 0                                                     | 0                                     | 0                                | 0.00                                    |
| St. Pierre and Miquelon  | \$0                  | 0.00                       | \$0                                                             | 0                                                    | 0                                | 0                                                     | 0                                     | 0                                | 0.00                                    |
| St. Vincent/ Grenadines  | \$0                  | 0.00                       | \$20,000                                                        | 9,300                                                | 9,300                            | 0                                                     | 0                                     | 0                                | 0.00                                    |
| Trinidad and Tobago      | \$0                  | 0.00                       | \$76,548                                                        | 9,500                                                | 9,500                            | 0                                                     | 9500                                  | 9,500                            | 0.00                                    |
| Turks and Caicos Islands | \$0                  | 0.00                       | \$35,973                                                        | 0                                                    | 0                                | 0                                                     | 0                                     | 0                                | 0.00                                    |
| Bahamas                  | \$291,324            | 0.02                       | \$56,401                                                        | 16,800                                               | 26,400                           | 9,600                                                 | 0                                     | 0                                | 0.00                                    |
| Jamaica                  | \$434,210            | 0.03                       | \$21,451                                                        | 7,600                                                | 7,400                            | -200                                                  | 0                                     | 0                                | 0.00                                    |
| Grenada                  | \$636,865            | 0.04                       | \$50,000                                                        | 0                                                    | 0                                | 0                                                     | 0                                     | 0                                | 0.00                                    |
| Martinique               | \$799,600            | 0.05                       | \$10,000                                                        | 10,000                                               | 10,000                           | 0                                                     | 0                                     | 10,000                           | 2.21                                    |
| Virgin Islands           | \$1,000,951          | 0.07                       | \$20,000                                                        | 0                                                    | 9,800                            | 9,800                                                 | 0                                     | 0                                | 0.00                                    |
| Dominican Republic       | \$1,171,646          | 0.08                       | \$43,136                                                        | 0                                                    | 9,200                            | 9,200                                                 | 0                                     | 0                                | 0.00                                    |
| El Salvador              | \$1,239,001          | 0.08                       | \$32,941                                                        | 0                                                    | 20,200                           | 20,200                                                | 0                                     | 0                                | 0.00                                    |
| Canada                   | \$1,739,113          | 0.12                       | \$2,937                                                         | 1,078,900                                            | 1,177,500                        | 98,600                                                | 0                                     | 49,900                           | 11.03                                   |
| Cuba                     | \$1,797,127          | 0.12                       | \$65,289                                                        | 39,800                                               | 29,800                           | -10,000                                               | 14900                                 | 14,900                           | 0.00                                    |
| Haiti                    | \$4,063,956          | 0.28                       | \$30,472                                                        | 19,400                                               | 13,500                           | -5,900                                                | 0                                     | 0                                | 0.00                                    |
| Guatemala                | \$6,875,220          | 0.47                       | \$33,120                                                        | 34,000                                               | 37,200                           | 3,200                                                 | 7800                                  | 7,800                            | 0.00                                    |
| Belize                   | \$7,848,888          | 0.54                       | \$50,563                                                        | 8,300                                                | 0                                | -8,300                                                | 0                                     | 0                                | 0.00                                    |
| Panama                   | \$8,209,918          | 0.56                       | \$31,801                                                        | 40,800                                               | 40,800                           | 0                                                     | 28400                                 | 28,400                           | 0.00                                    |

Table S1. Continued.

| Continent and country    | Total spending (\$)* | Proportion of spending (%) | Average opportunity cost/ha of "potential conservation habitat" | Area selected for meeting targets (km <sup>2</sup> ) |                                  |                                                       | Irreplaceable area (km <sup>2</sup> ) |                                  |                                         |
|--------------------------|----------------------|----------------------------|-----------------------------------------------------------------|------------------------------------------------------|----------------------------------|-------------------------------------------------------|---------------------------------------|----------------------------------|-----------------------------------------|
|                          |                      |                            |                                                                 | Without socioeconomic objectives                     | When minimizing opportunity cost | Increase or decrease in area required to meet targets | Without socioeconomic objectives      | When minimizing opportunity cost | % of total increased irreplaceable area |
| Costa Rica               | \$8,576,894          | 0.59                       | \$34,163                                                        | 22,700                                               | 12,600                           | -10,100                                               | 7700                                  | 7,700                            | 0.00                                    |
| Honduras                 | \$13,041,904         | 0.89                       | \$38,348                                                        | 21,400                                               | 20,800                           | -600                                                  | 7800                                  | 7,800                            | 0.00                                    |
| Nicaragua                | \$14,614,230         | 1.00                       | \$36,648                                                        | 12,200                                               | 17,500                           | 5,300                                                 | 0                                     | 0                                | 0.00                                    |
| Mexico                   | \$51,213,408         | 3.49                       | \$17,291                                                        | 443,600                                              | 416,700                          | -26,900                                               | 141400                                | 151,400                          | 2.21                                    |
| United States            | \$757,001,635        | 51.66                      | \$15,537                                                        | 2,549,600                                            | 2,523,400                        | -26,200                                               | 60000                                 | 60,000                           | 0.00                                    |
| <b>Southern Americas</b> | <b>\$115,817,763</b> | <b>7.90</b>                | <b>\$41,880</b>                                                 | <b>2,407,300</b>                                     | <b>2,395,000</b>                 | <b>-12,300</b>                                        | <b>186200</b>                         | <b>196,200</b>                   | <b>2.21</b>                             |
| French Guiana            | \$0                  | 0.00                       | \$66,294                                                        | 10,000                                               | 9,900                            | -100                                                  | 0                                     | 0                                | 0.00                                    |
| Uruguay                  | \$130,994            | 0.01                       | \$53,632                                                        | 20,300                                               | 23,100                           | 2,800                                                 | 0                                     | 0                                | 0.00                                    |
| Falkland Islands         | \$275,000            | 0.02                       | \$0                                                             | 0                                                    | 0                                | 0                                                     | 0                                     | 0                                | 0.00                                    |
| Guyana                   | \$1,054,333          | 0.07                       | \$54,271                                                        | 19,800                                               | 48,700                           | 28,900                                                | 0                                     | 0                                | 0.00                                    |
| Suriname                 | \$1,598,333          | 0.11                       | \$58,796                                                        | 19,900                                               | 30,000                           | 10,100                                                | 0                                     | 0                                | 0.00                                    |
| Chile                    | \$4,111,690          | 0.28                       | \$2,666                                                         | 146,700                                              | 140,900                          | -5,800                                                | 16900                                 | 16,900                           | 0.00                                    |
| Paraguay                 | \$6,793,129          | 0.46                       | \$32,367                                                        | 56,200                                               | 66,800                           | 10,600                                                | 0                                     | 0                                | 0.00                                    |
| Peru                     | \$7,298,366          | 0.50                       | \$14,358                                                        | 234,500                                              | 246,400                          | 11,900                                                | 19800                                 | 19,800                           | 0.00                                    |
| Venezuela                | \$7,989,036          | 0.55                       | \$62,647                                                        | 146,000                                              | 134,600                          | -11,400                                               | 0                                     | 0                                | 0.00                                    |
| Ecuador                  | \$9,303,062          | 0.63                       | \$23,705                                                        | 83,300                                               | 65,300                           | -18,000                                               | 20000                                 | 30,000                           | 2.21                                    |
| Argentina                | \$9,346,073          | 0.64                       | \$21,684                                                        | 319,100                                              | 304,500                          | -14,600                                               | 18600                                 | 18,600                           | 0.00                                    |
| Colombia                 | \$9,665,801          | 0.66                       | \$38,995                                                        | 147,100                                              | 198,100                          | 51,000                                                | 36100                                 | 36,100                           | 0.00                                    |
| Bolivia                  | \$10,561,518         | 0.72                       | \$61,685                                                        | 161,400                                              | 151,300                          | -10,100                                               | 9300                                  | 9,300                            | 0.00                                    |
| Brazil                   | \$47,690,426         | 3.25                       | \$53,528                                                        | 1,043,000                                            | 975,400                          | -67,600                                               | 65500                                 | 65,500                           | 0.00                                    |
| <b>TOTAL</b>             | <b>1.465 billion</b> | <b>100</b>                 | <b>na</b>                                                       | <b>19.12 million</b>                                 | <b>19.47 million</b>             | <b>na</b>                                             | <b>1.18 million</b>                   | <b>1.64 million</b>              | <b>na</b>                               |

\*Data are from Halpern BS, et al (2005) Gaps and mismatches between global priorities and spending. *Conserv Biol* 20:56–64.
